# Supplementary material for: Ixr1 Regulates Ribosomal Gene Transcription and Yeast Response to Cisplatin
Source: PubMed Central journal article supplement (PMC5814428; doi:10.1038/s41598-018-21439-1), 2018-02-15
Supplement: 41598_2018_21439_MOESM1_ESM.pdf [file 41598_2018_21439_MOESM1_ESM.pdf]

**SUPPLEMENTARY INFORMATION TO**

**Ixr1 Regulates Ribosomal Gene Transcription and Yeast Response to Cisplatin**

Ángel Vizoso-Vázquez, Mónica Lamas-Maceiras, M. Isabel González-Siso and M. Esperanza Cerdán\*

Universidade da Coruña, Grupo EXPRELA, Centro de Investigacións Científicas Avanzadas (CICA), Facultade de Ciencias, 15071 A Coruña, Spain.

Running Head: Ixr1 master rRNA regulator and cisplatin response

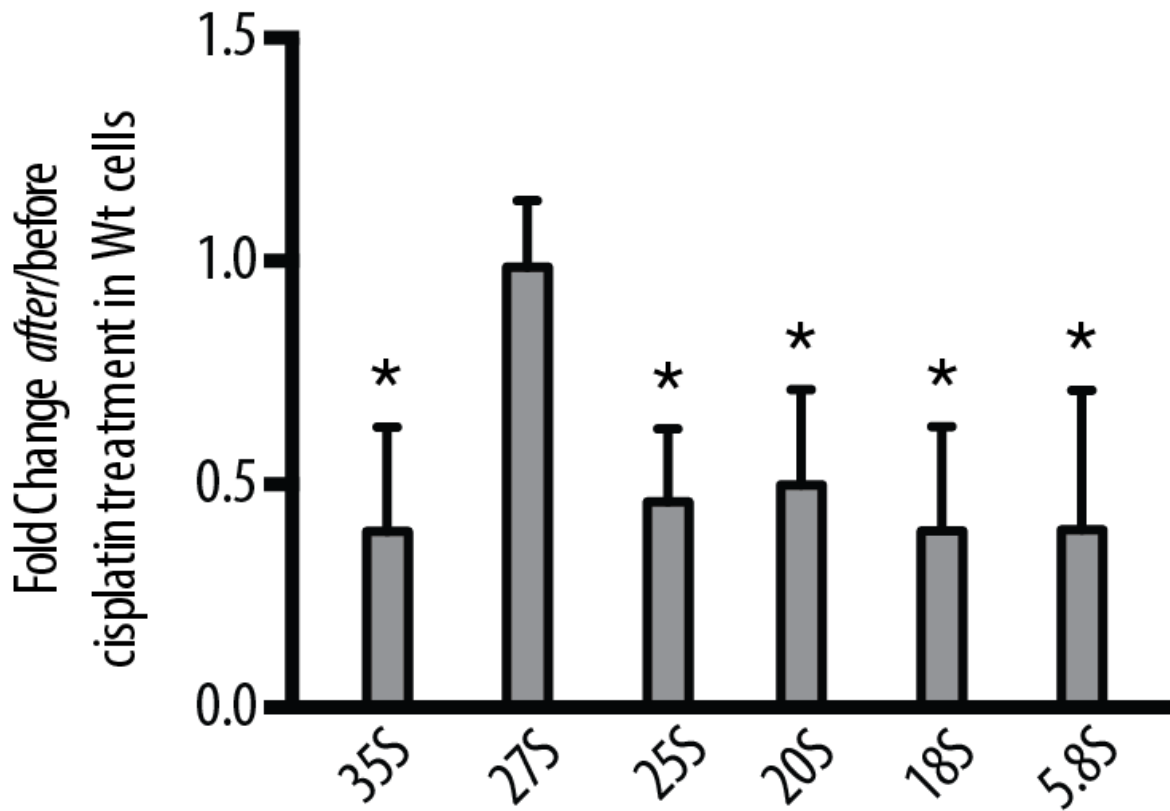

**Figure S1.** Fold changes in rRNAs and precursors expression change in W303 cells after cisplatin treatment *versus* untreated cells. Relative positions of the primers designed for qPCR quantitation of the rRNAs and precursors have been depicted in Figure 3C.

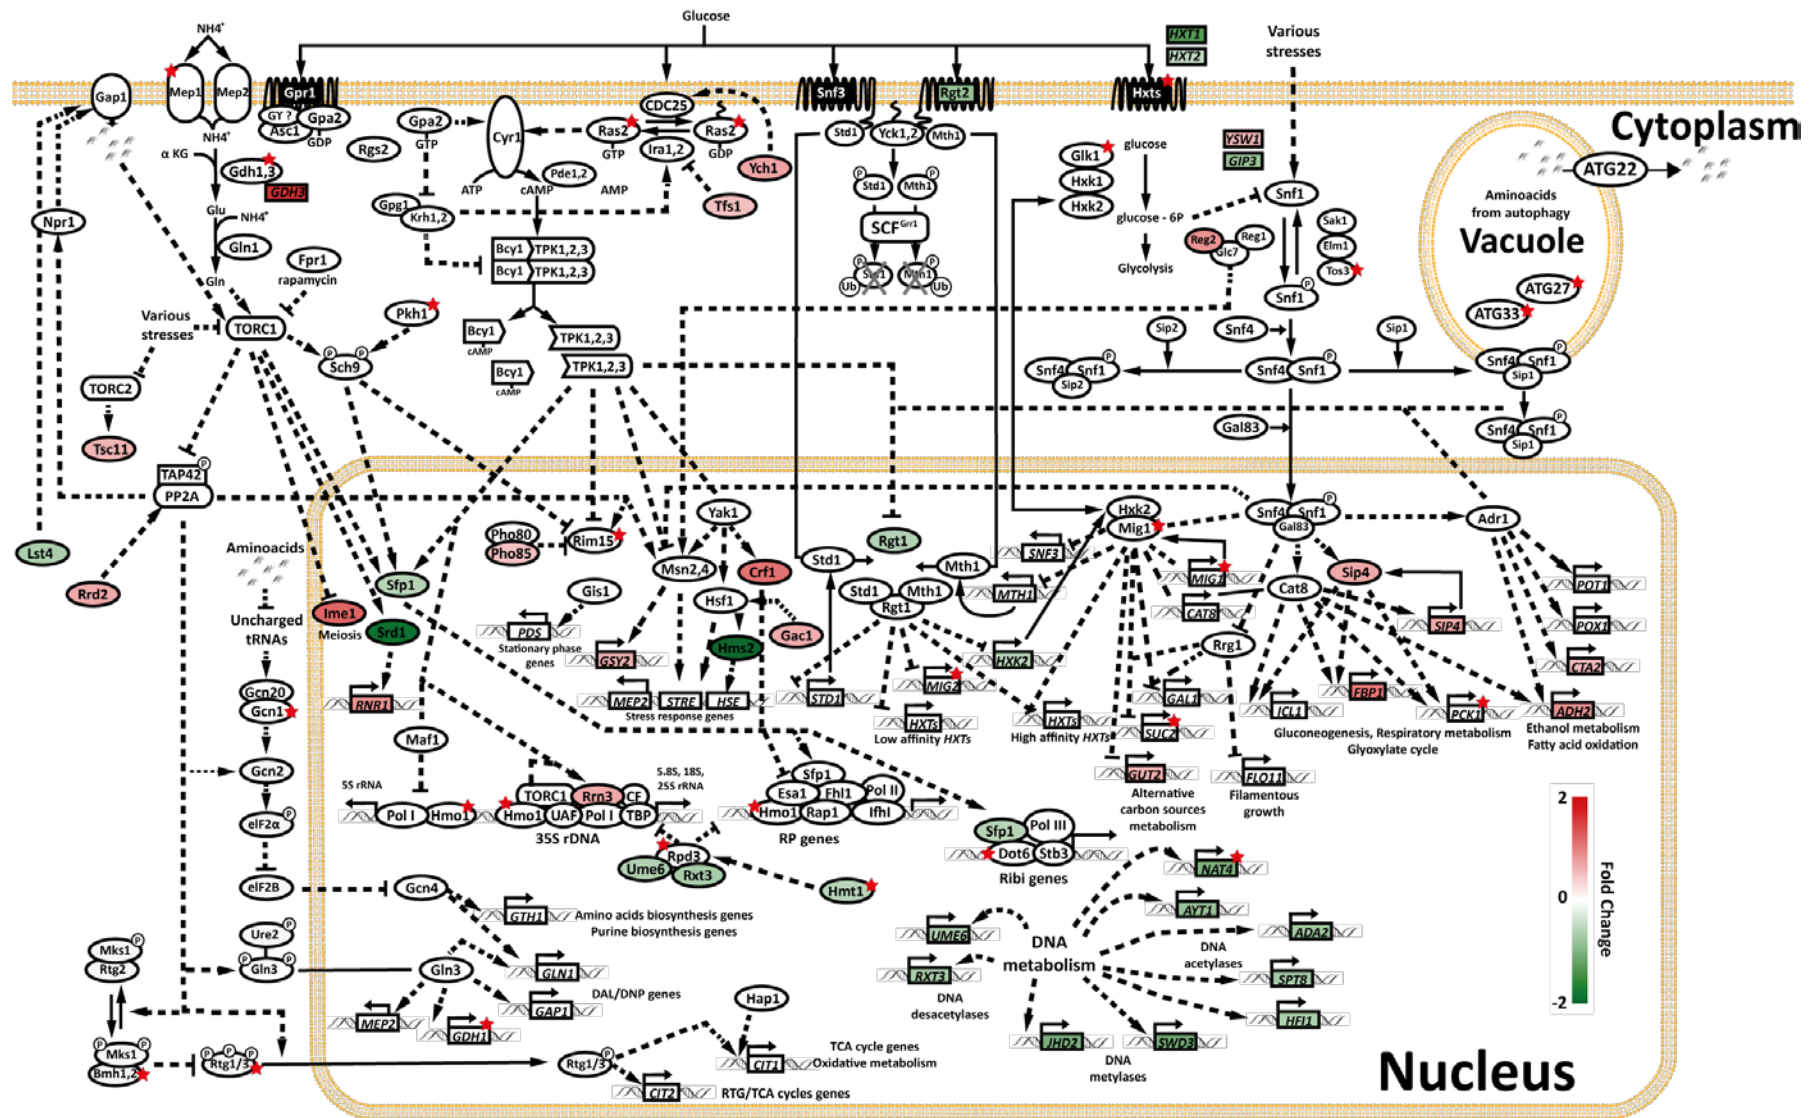

**Figure S2.** Schematic view (modified from <sup>78, 107</sup> showing how *IXR1* deletion alters the transcription of several genes encoding proteins involved in TOR and other nutrient sensing pathways. In the signal pathways, genes are represented by squares and proteins by ellipses. Color shading of either squares or ellipses represents that these components of the pathways are transcriptionally influenced by *Ixr1*. The color intensity code represents the fold change values (*ixr1Δ* versus W303), as indicated on the scale. Red stars are genes in whose promoter regions an *Ixr1* binding site was detected by ChIP on chip experiments.

**Table S7.-Oligonucleotides used in this study**

| <b>Oligo Name</b> | <b>Sequence</b>            | <b>Gene</b>          | <b>Strand</b> | <b>Position</b> |
|-------------------|----------------------------|----------------------|---------------|-----------------|
| AVV220            | AGAACTTGGCGATTGCTGACA      | <i>ROX1</i>          | W             | -408            |
| AVV221            | AAGACCGTTACATTACGCAAAGTG   | <i>ROX1</i>          | C             | -275            |
| AVV222            | CATACACATCGTGCTTAGCGATC    | <i>IXR1</i>          | W             | -526            |
| AVV223            | CCCATTTCGTTCTCTACCAAG      | <i>IXR1</i>          | C             | -376            |
| AVV224            | CATAAAGGGTCTTTTCACCTATACG  | <i>TIR1</i>          | W             | -273            |
| AVV225            | CTTCACTTTTTTCTCTGTCAAGGG   | <i>TIR1</i>          | C             | -178            |
| AVV226            | TCAAACCATTTCCTGCGGAG       | <i>HEM13</i>         | W             | -539            |
| AVV227            | TGCCTATGACGGTAATCCCAG      | <i>HEM13</i>         | C             | -406            |
| Primer A ChIP     | GTTTCCCAGTCACGGTCNNNNNNNNN | -                    | -             | -               |
| Primer B ChIP     | GTTTCCCAGTCACGGTC          | -                    | -             | -               |
| AVV35q            | GACCACAAGTAAGGGCAAGAA      | <i>HHO1</i>          | W             | +28             |
| AVV36q            | GCCTTGGAAGTTGATTTCTCC      | <i>HHO1</i>          | C             | +89             |
| AVV37q            | GAGGAGATTCTAGAGATGATGGACA  | <i>TAF10</i>         | W             | +223            |
| AVV38q            | AGTCTATTACTGCATCGGGAATG    | <i>TAF10</i>         | C             | +283            |
| AVV379            | CACTAGTTCATCAGTTCGTATGACAA | <i>SFP1</i>          | W             | +732            |
| AVV380            | GGCCATGTTATTCTGCAGGT       | <i>SFP1</i>          | C             | +801            |
| AVV381            | TCATGGTAATGACAGCGGTAAC     | <i>ABF1</i>          | W             | +630            |
| AVV382            | TTTCGTCATTTGGGTATGGAC      | <i>ABF1</i>          | C             | +696            |
| AVV383            | CTGGACTGGGTGCTAAATCG       | <i>TEC1</i>          | W             | +224            |
| AVV384            | TCTGCTTGTCAGTGAACGTAGC     | <i>TEC1</i>          | C             | +292            |
| AVV385            | TTCCTGAACAGTGGCCGTA        | <i>SOK2</i>          | W             | +188            |
| AVV386            | GCAGTTGCTGTTGAGACTGG       | <i>SOK2</i>          | C             | +253            |
| AVV387            | TGCTCCAGAACAACAACAGC       | <i>UME6</i>          | W             | +1936           |
| AVV388            | GCGTTTCCAACCTGACCTTCT      | <i>UME6</i>          | C             | +2003           |
| AVV389            | GCTTATTTTGCACGGAAAT        | <i>DAL81</i>         | W             | +1861           |
| AVV390            | CAGTTCCTTTGGAGTTTGAGGA     | <i>DAL81</i>         | C             | +1935           |
| AVV391            | AAGTGTGTCCTTTCATCAA        | <i>CRF1</i>          | W             | +111            |
| AVV392            | ATAGAGGGGTCCCAAAGAGC       | <i>CRF1</i>          | C             | +170            |
| AVV363            | CCAGCAACTACTTTCAGAGTG      | <i>SPT15</i>         | W             | +106            |
| AVV364            | GCGGAGGTGTCTTTTTCAGA       | <i>SPT15</i>         | C             | +177            |
| AVV365            | CCCACCGGTATAGAGACAA        | <i>RRN6</i>          | W             | +1513           |
| AVV366            | CCTCCTCTCTCCGAGATTCA       | <i>RRN6</i>          | C             | +1577           |
| AVV367            | CCCAGACAAACCGACTTCTAGT     | <i>RRN7</i>          | W             | +1071           |
| AVV368            | CCATCCAATTCAAAACTCTAGG     | <i>RRN7</i>          | C             | +1144           |
| AVV369            | AGTGTGACGCCGAAAGA          | <i>TGS1</i>          | W             | +229            |
| AVV370            | CAGTATTCTTTCGGCATTG        | <i>TGS1</i>          | C             | +306            |
| AVV371            | CTGGGGGTTGACTTCATTGT       | <i>MRM1</i>          | W             | +793            |
| AVV372            | GCTTGTCTTGGACACCACAG       | <i>MRM1</i>          | C             | +865            |
| AVV373            | CCCAGGCAAGAAAGTTTAA        | <i>NOP1</i>          | W             | +494            |
| AVV374            | CCAACAACATCTGAAACGTGA      | <i>NOP1</i>          | C             | +566            |
| AVV375            | TGGGTACTTTCTACTATACGAGTCCA | <i>HMT1</i>          | W             | +401            |
| AVV376            | CCGCCTTCTACCAAATAGTGG      | <i>HMT1</i>          | C             | +476            |
| AVV377            | CATGCAATCCGAGAGACG         | <i>SRD1</i>          | W             | +323            |
| AVV378            | TGCACAACATGGTAGCCTTCA      | <i>SRD1</i>          | C             | +390            |
| AVV406            | CCGGGGCCTAGTTTAGAGAGAAG    | <i>RDN37-1 (37S)</i> | W             | +6682           |

**Table S7.**-Oligonucleotides used in this study (continued)

|        |                              |                       |   |       |
|--------|------------------------------|-----------------------|---|-------|
| AVV407 | AATACATGTTTTTACCCGGATCATAG   | <i>RDN37-1 (37S)</i>  | C | +6773 |
| AVV408 | GCTGGCCTTTTCATTGGATG         | <i>RDN37-1 (27S)</i>  | W | +3077 |
| AVV409 | CCGTACTTGCATTATACCTCAAGC     | <i>RDN37-1 (27S)</i>  | C | +3150 |
| AVV410 | TGGTCAGAAAGTGATGTTGACGC      | <i>RDN37-1 (25S)</i>  | W | +5410 |
| AVV411 | CTTAAGAGAGTCATAGTTACTCCCGC   | <i>RDN37-1 (25S)</i>  | C | +5523 |
| AVV412 | CGGTGAGAGATTTCTGTGCTTTTG     | <i>RDN37-1 (20S)</i>  | W | +2657 |
| AVV413 | TGAAAACCTCCACAGTGTGTTGTATTG  | <i>RDN37-1 (20S)</i>  | C | +2729 |
| AVV414 | TACAGTGAAACTGCGAATGGCTC      | <i>RDN37-1 (18S)</i>  | W | +777  |
| AVV415 | GCTCTAGAATTACCACAGTTATACCATG | <i>RDN37-1 (18S)</i>  | C | +866  |
| AVV416 | GCATCGATGAAGAACGCAGC         | <i>RDN37-1 (5.8S)</i> | W | +2892 |
| AVV417 | AATGTGCGTTCAAAGATTCGATG      | <i>RDN37-1 (5.8S)</i> | C | +2975 |

**See also datasets**

**Table S1.** DEGs upregulated in *ixr1Δ* compared with W303 in absence of cisplatin treatment.

**Table S2.** DEGs downregulated in *ixr1Δ* compared with W303 in absence of cisplatin treatment.

**Table S3.** DEGs upregulated in *ixr1Δ* compared with W303 after cisplatin treatment.

**Table S4.** DEGs downregulated in *ixr1Δ* compared with W303 after cisplatin treatment.

**Table S5.** Ixr1 DNA-binding in absence of cisplatin.

**Table S6.** Ixr1 DNA-binding after cisplatin treatment.
